# Supplementary material for: Diverse nanostructures and gel behaviours contained in a thermo- and dual-pH-sensitive ABC (PNIPAM–PAA–P4VP) terpolymer in an aqueous solution
Source: Royal Society of Chemistry journal article supplement (doi:10.1039/c6ra14682a), 2016-01-01
Supplement: c6ra14682a1.pdf [file c6ra14682a1.pdf]

CSupporting Information

**Diverse Nanostructures and Gel Behaviours Contained in A Thermo- and Dual-pH-sensitive ABC  
(PNIPAM-PAA-P4VP) Terpolymer in Aqueous Solution**

Ping Yong, Yuejiao Yang, Zhiyong Wang, Liming Yang and Jie Chen\*

Department of Chemical Engineering, School of Environmental and Chemical Engineering, Shanghai University, Shangda Road 99, Shanghai 200444, P. R. China Email: jchen@shu.edu.cn Tel: +86 21 66137482

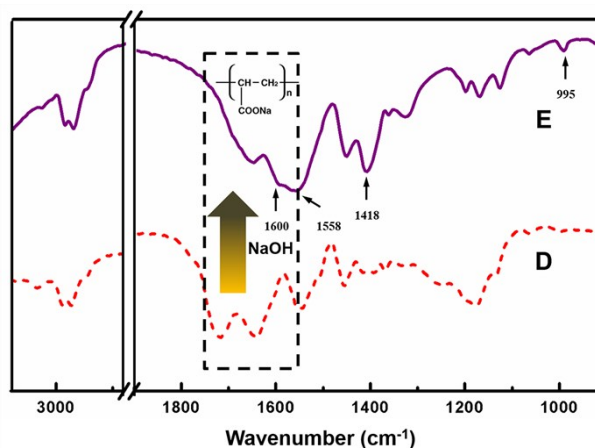

**Figure. S1** Spectra D and E are FT-IR spectra of NAV (PNIPAM-*b*-PAA-*b*-P4VP) and sodium PAA-copolymer (PNIPAM-*b*-PAAS-*b*-P4VP).

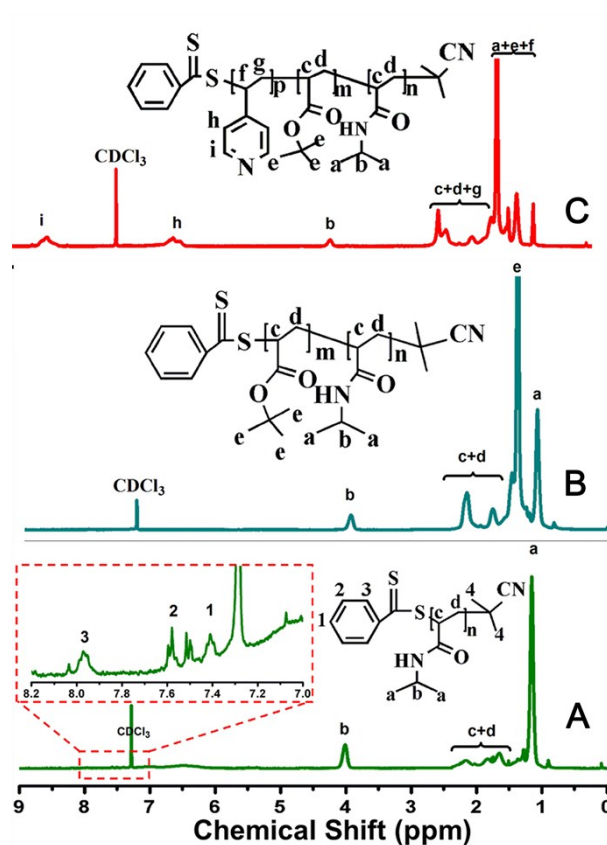

**Figure. S2**  $^1\text{H}$  NMR spectrum in  $\text{CDCl}_3$ : (A) CPDB-PNIPAM, (B) PNIPAM-*b*-PtBA, and (C) PNIPAM-*b*-PtBA-*b*-P4VP.

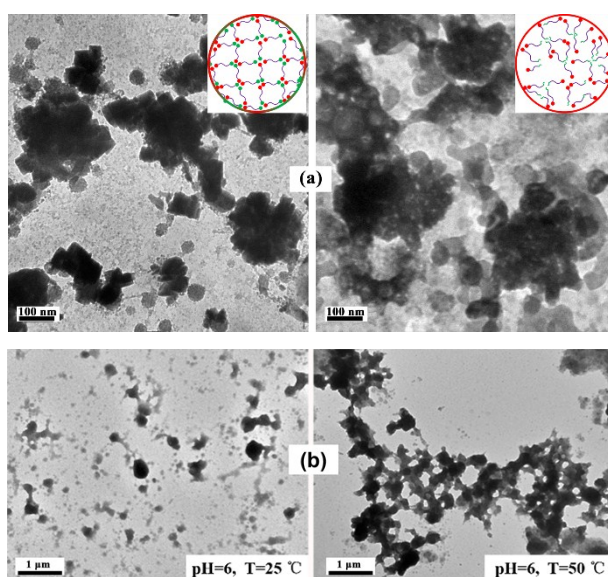

**Figure. S3** TEM images of NAV triblock copolymer with different structure at 25°C and 50°C, respectively: (a)  $\text{LCM}_1$  nanostructure under  $\text{pH}=1$ ; (b) Crosslinking structure under  $\text{pH}=6$ .

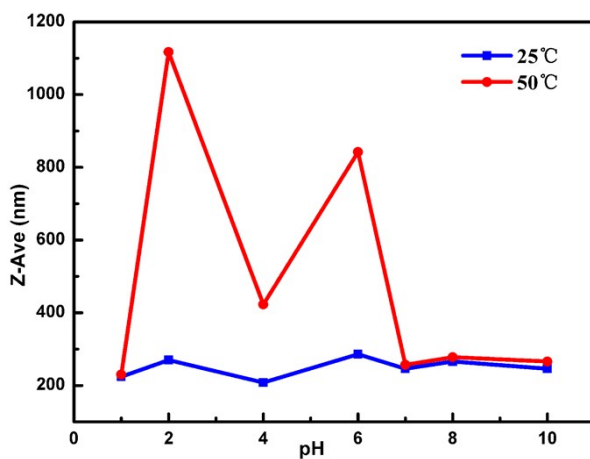

**Figure. S4** Z-Ave (average hydrodynamic diameter) of NAV triblock copolymer in aqueous solutions with pH values range 1 to 10 at 25°C and 50°C, respectively.

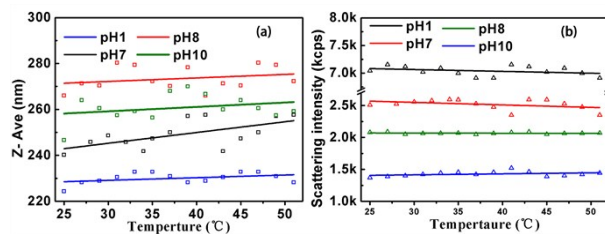

**Figure. S5** In aqueous solutions of pH 1, 7, 8, 10, (a) The change of average hydrodynamic diameter (Z-Ave) with temperature. (b) The change of derived count rate with temperature.

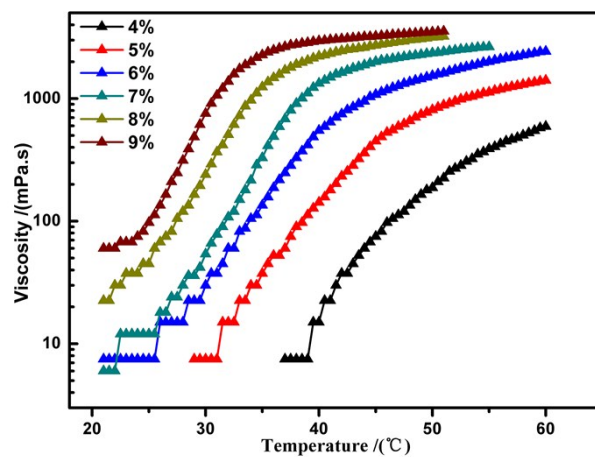

**Figure. S6** Viscosity curves of NAV system depend on temperature with different copolymer concentrations in an aqueous solution of pH 7.4. The viscosity measurements were carried out using 64# spindle with a constant rotate speed of 100RPM and a constant heating/cooling rate of 1.0 °C/min, and the viscosity and temperature of NAV concentrated solutions were read on viscometer.
